# Supplementary material
Source: Springer Nature journal article supplement (https://www.springermedizin.de/resource/supplementary/12887_2012_697_MOESM2_ESM.pdf/9475824)
Supplement: MOESM2 [file 9475824]

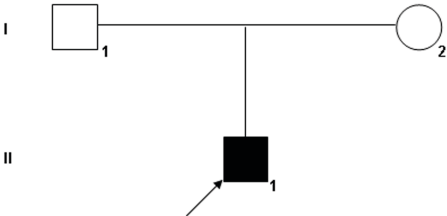

|     |     |      |     |     |     |     |                                                                                                                                                                                           |                                                                                                            |
|-----|-----|------|-----|-----|-----|-----|-------------------------------------------------------------------------------------------------------------------------------------------------------------------------------------------|------------------------------------------------------------------------------------------------------------|
| 212 | 220 | 220  | 220 | 212 | 212 | 220 | DXYS10093<br>DXYS10092<br>DYS290<br>DXYS10083<br>DXS6796<br>DXYS10088<br>DXYS10089<br>DXYS10082<br>DXYS10085<br>DXYS10084<br>DXYS10097<br>DXS7107<br>DXS7099<br>DXS6807<br>X1<br>X4<br>X2 | PAR1<br><br><br><br><br><br><br><br><br><br><br><br><br><br><br><br>Xp22.33<br>Xq13.1<br>Xq21.33<br>Xq25.2 |
| 359 | 339 | 339  | 339 | 363 | 363 | 339 |                                                                                                                                                                                           |                                                                                                            |
| 304 | 288 | 288  | 288 | 304 | 304 | 292 |                                                                                                                                                                                           |                                                                                                            |
| 162 | 162 | 162  | 162 | 162 | 162 | 174 |                                                                                                                                                                                           |                                                                                                            |
| 225 | 219 | 219  | 219 | 227 | 227 | 223 |                                                                                                                                                                                           |                                                                                                            |
| 238 | 238 | 238  | 238 | 232 | 232 | 241 |                                                                                                                                                                                           |                                                                                                            |
| 215 | 219 | 219  | 219 | 211 | 211 | 207 |                                                                                                                                                                                           |                                                                                                            |
| 192 | 196 | 196  | 196 | 188 | 188 | 188 |                                                                                                                                                                                           |                                                                                                            |
| 220 | 214 | 214  | 214 | 214 | 214 | 220 |                                                                                                                                                                                           |                                                                                                            |
| 210 | 210 | 210  | 210 | 208 | 208 | 216 |                                                                                                                                                                                           |                                                                                                            |
| 169 | 151 | 169  | 151 | 179 | 179 | 167 |                                                                                                                                                                                           |                                                                                                            |
| 173 | 173 | 173  | 173 | 177 | 177 | 171 |                                                                                                                                                                                           |                                                                                                            |
| 199 | Y   | 199  | Y   | 191 | 191 | 199 |                                                                                                                                                                                           |                                                                                                            |
| 271 | Y   | 271  | Y   | 251 | 251 | 251 |                                                                                                                                                                                           |                                                                                                            |
| 249 | Y   | 249  | Y   | 245 | 245 | 256 |                                                                                                                                                                                           |                                                                                                            |
| 330 | Y   | 330  | Y   | 326 | 326 | 318 |                                                                                                                                                                                           |                                                                                                            |
| 149 | Y   | 149  | Y   | 154 | 154 | 158 |                                                                                                                                                                                           |                                                                                                            |
| X   | Y   | X(r) | Y   | X   | X   | X   |                                                                                                                                                                                           |                                                                                                            |
